# Supplementary material for: Genome-wide survey of parent-of-origin-specific associations across clinical traits derived from electronic health records
Source: PubMed Central journal article supplement — HGG Adv. 2021 Jun 11;2(3):100039. doi: 10.1016/j.xhgg.2021.100039 (PMC8756508; doi:10.1016/j.xhgg.2021.100039), 2021-06-11

**HGGA, Volume 2**

**Supplemental information**

**Genome-wide survey of parent-of-origin-specific  
associations across clinical traits derived  
from electronic health records**

**Hye In Kim, Bin Ye, Jeffrey Staples, Anthony Marcketta, Chuan Gao, Regeneron Genetics Center, Geisinger Regeneron DiscovEHR Collaboration, Alan R. Shuldiner, and Cristopher V. Van Hout**

## Supplemental Information

### Geisinger Regeneron DiscovEHR Collaboration Banner and Contribution Statement

All authors/contributors are listed in alphabetical order.

Lance J. Adams<sup>1</sup>, Jackie Blank<sup>1</sup>, Dale Bodian<sup>1</sup>, Derek Boris<sup>1</sup>, Adam Buchanan<sup>1</sup>, David J. Carey<sup>1</sup>, Ryan D. Colonie<sup>1</sup>, F. Daniel Davis<sup>1</sup>, Dustin N. Hartzel<sup>1</sup>, Melissa Kelly<sup>1</sup>, H. Lester Kirchner<sup>1</sup>, Joseph B. Leader<sup>1</sup>, David H. Ledbetter<sup>1</sup>, Ph.D., J. Neil Manus<sup>1</sup>, Christa L. Martin<sup>1</sup>, Michelle Meyer<sup>1</sup>, Tooraj Mirshahi<sup>1</sup>, Matthew Oetjens<sup>1</sup>, Thomas Nate Person<sup>1</sup>, Christopher Still<sup>1</sup>, Natasha Strande<sup>1</sup>, Amy Sturm<sup>1</sup>, Jen Wagner<sup>1</sup>, Marc Williams<sup>1</sup>

Contribution: Development and validation of clinical phenotypes used to identify study participants and (when applicable) controls.

Affiliations:

1. Geisinger, Danville, PA

### Regeneron Genetics Center Banner and Contribution Statements

All contributors are listed in alphabetical order. RGC Management and Leadership Team:

Goncalo R. Abecasis, D.Phil.<sup>1</sup>, Aris Baras, M.D.<sup>1</sup>, Michael Cantor, M.D.<sup>1</sup>, Giovanni Coppola, M.D.<sup>1</sup>, Aris Economides, Ph.D.<sup>1</sup>, John D. Overton, Ph.D.<sup>1</sup>, Jeffrey G. Reid, Ph.D.<sup>1</sup>, Alan R. Shuldiner, M.D.<sup>1</sup>

Contribution: All authors contributed to securing funding, study design and oversight, and review and interpretation of data and results.

Sequencing and Lab Operations:

Christina Beechert<sup>1</sup>, Erin Brian<sup>1</sup>, Alex DeVito<sup>1</sup>, Caitlin Forsythe<sup>1</sup>, Erin D. Fuller<sup>1</sup>, Zhenhua Gu<sup>1</sup>, Joe LaRosa<sup>1</sup>, Michael Lattari<sup>1</sup>, Alexander Lopez<sup>1</sup>, Kia Manoochehri<sup>1</sup>, Justin Marcovici<sup>1</sup>, Manasi Pradhan<sup>1</sup>, John D. Overton, Ph.D.<sup>1</sup>, Thomas D. Schleicher<sup>1</sup>, Maria Sotiropoulos Padilla<sup>1</sup>, Karina Toledo<sup>1</sup>, Emelia Weihinig<sup>1</sup>, Louis Widom<sup>1</sup>, Sarah E. Wolf<sup>1</sup>, Ricardo H. Ulloa<sup>1</sup>

Contribution: Performed and are responsible for sample genotyping and exome sequencing, conceived and are responsible for laboratory automation, and responsible for sample tracking and the library information management system.

#### Genome Informatics:

Xiaodong Bai, Ph.D.<sup>1</sup>, Suganthi Balasubramanian, Ph.D.<sup>1</sup>, Leland Barnard, Ph.D.<sup>1</sup>, Andrew Blumenfeld<sup>1</sup>, Boris Boutkov<sup>1</sup>, Yating Chai, Ph.D.<sup>1</sup>, Gisu Eom<sup>1</sup>, Lukas Habegger, Ph.D.<sup>1</sup>, Young Hahn<sup>1</sup>, Alicia Hawes<sup>1</sup>, Shareef Khalid<sup>1</sup>, Olga Krasheninina<sup>1</sup>, Rouel Lanche<sup>1</sup>, Adam Mansfield<sup>1</sup>, Evan K. Maxwell, Ph.D.<sup>1</sup>, Mona Nafde<sup>1</sup>, Sean O’Keeffe, Ph.D.<sup>1</sup>, John Penn<sup>1</sup>, Ayesha Rasool<sup>1</sup>, William Salerno, Ph.D.<sup>1</sup>, Jeffrey C. Staples, Ph.D.<sup>1</sup>, Jeffrey G. Reid, Ph.D.<sup>1</sup>

Contribution: Performed and are responsible for analysis needed to produce exome and genotype data, provided compute infrastructure development and operational support, provided variant and gene annotations and their functional interpretation of variants, and conceived and are responsible for creating, developing, and deploying analysis platforms and computational methods for analyzing genomic data.

#### Clinical Informatics:

Nilanjana Banerjee, Ph.D.<sup>1</sup>, Michael Cantor, M.D.<sup>1</sup>, Dadong Li Ph.D.<sup>1</sup>, Fabricio Sampaio Peres Kury M.D.<sup>1</sup>, Deepika Sharma B.H.M.S.<sup>1</sup>, Ashish Yadav<sup>1</sup>

Contribution: All authors contributed to the development and validation of clinical phenotypes used to identify study participants and (when applicable) controls.

#### Analytical Genomics and Data Science:

Goncalo R. Abecasis, D.Phil.<sup>1</sup>, Joshua Backman, Ph.D.<sup>1</sup>, Mathew Barber, Ph.D.<sup>1</sup>, Christian Benner, Ph.D.<sup>1</sup>, Shan Chen, Ph.D.<sup>1</sup>, Amy Damask, Ph.D.<sup>1</sup>, Manuel Allen Revez Ferreira, Ph.D.<sup>1</sup>, Lauren Gurski<sup>1</sup>, Jack Kosmicki, Ph.D.<sup>1</sup>, Alexander Li, Ph.D.<sup>1</sup>, Nan Lin, Ph.D.<sup>1</sup>, Daren Liu<sup>1</sup>, Jonathan Marchini Ph.D.<sup>1</sup>, Anthony Marcketta<sup>1</sup>, Joelle Mbatchou, Ph.D.<sup>1</sup>, Shane McCarthy, Ph.D.<sup>1</sup>, Colm O’Dushlaine, Ph.D.<sup>1</sup>, Charles Paulding, Ph.D.<sup>1</sup>, Claudia Schurmann, Ph.D.<sup>1</sup>, Dylan Sun<sup>1</sup>, Cristopher Van Hout, Ph.D.<sup>1</sup>, Kyoko Watanabe, Ph.D.<sup>1</sup>, Bin Ye<sup>1</sup>, Andrey Ziyatdinov, Ph.D.<sup>1</sup>

Contribution: Development of statistical analysis plans. QC of genotype and phenotype files and generation of analysis ready datasets. Development of

statistical genetics pipelines and tools and use thereof in generation of the association results. QC, review and interpretation of result. Generation and formatting of results for manuscript figures.

#### Therapeutic Area Genetics:

Ariane Ayer<sup>1</sup>, Giovanni Coppola M.D.<sup>1</sup>, Silvio Alessandro Di Gioia, Ph.D.<sup>1</sup>, Jan Freudenberg, M.D.<sup>1</sup>, Sahar Gelfman, Ph.D.<sup>1</sup>, Claudia Gonzaga-Jauregui, Ph.D.<sup>1</sup>, Nehal Gosalia, Ph.D.<sup>1</sup>, Julie Horowitz, Ph.D.<sup>1</sup>, Luca Lotta M.D. Ph.D.<sup>1</sup>, Kavita Praveen, Ph.D.<sup>1</sup>

Contribution: Development of study design and analysis plans. Development and QC of phenotype definitions. QC, review, and interpretation of association results.

#### Functional Modeling:

Shek Man Chim, Ph.D.<sup>1</sup>, Giusy Della Gatta, Ph.D.<sup>1</sup>, Aris Economides, Ph.D.<sup>1</sup>, Lawrence Miloscio<sup>1</sup>, Harikiran Nistala, Ph.D.<sup>1</sup>, Trikaldarshi Persaud<sup>1</sup>

Contribution: Development of *in vivo* and *in vitro* experimental biology and interpretation.

#### Planning, Strategy, and Operations:

Paloma M. Guzzardo, Ph.D.<sup>2</sup>, Marcus B. Jones, Ph.D.<sup>2</sup>, Michelle LeBlanc, Ph.D.<sup>2</sup>, Jason Mighty, Ph.D.<sup>2</sup>, Lyndon J. Mitnaul, Ph.D.<sup>2</sup>

Contribution: Contributed to the management and coordination of all research activities, planning and execution, managed the review of the project.

#### Affiliations:

<sup>1</sup> Regeneron Genetics Center, Tarrytown, NY USA, <sup>2</sup> Regeneron Pharmaceuticals, Tarrytown, NY USA

**Figure S1. Distribution of genomic inflation factors under PoO models**

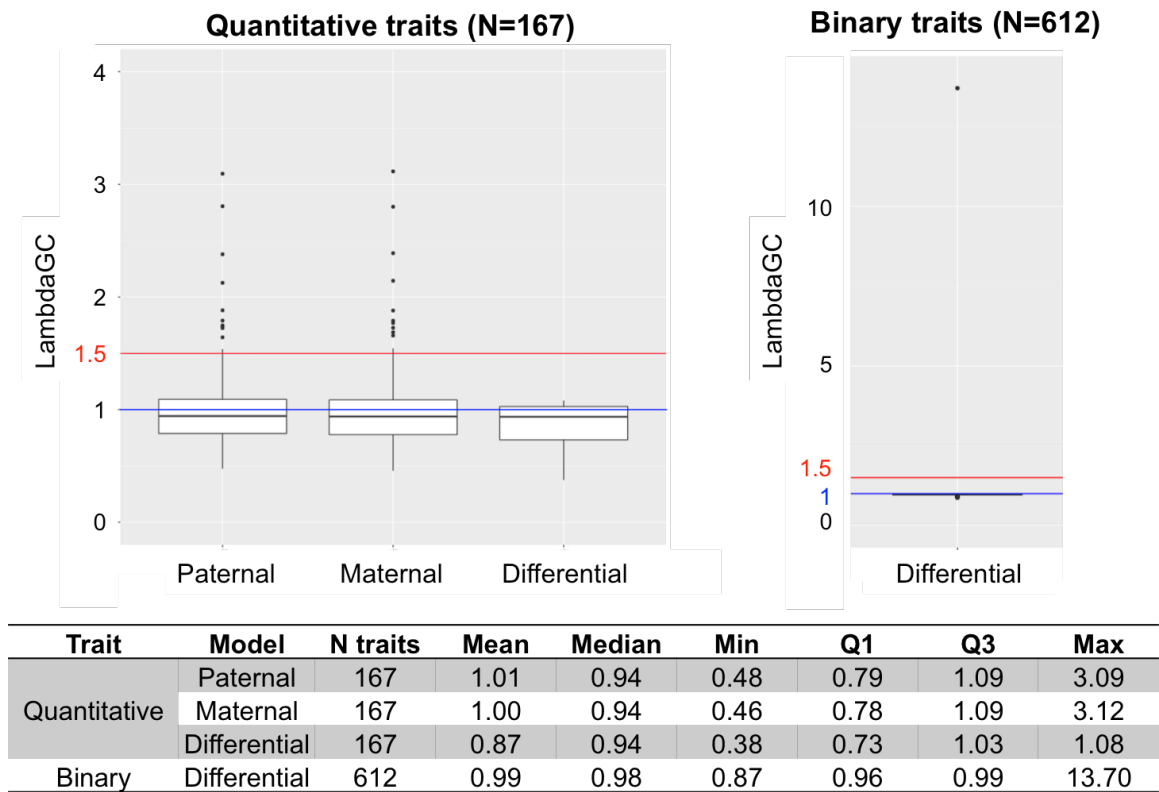

Distribution of lambdaGC values from GWAS results across 167 quantitative and 612 binary traits under different PoO statistical models is shown. 13 quantitative and 1 binary traits with genomic inflation >1.5 under any statistical model were omitted from further analyses.

**Figure S2. Quantile-Quantile plots under each statistical model for 6 traits with significant and replicated PoO associations**

## **% Monocyte**

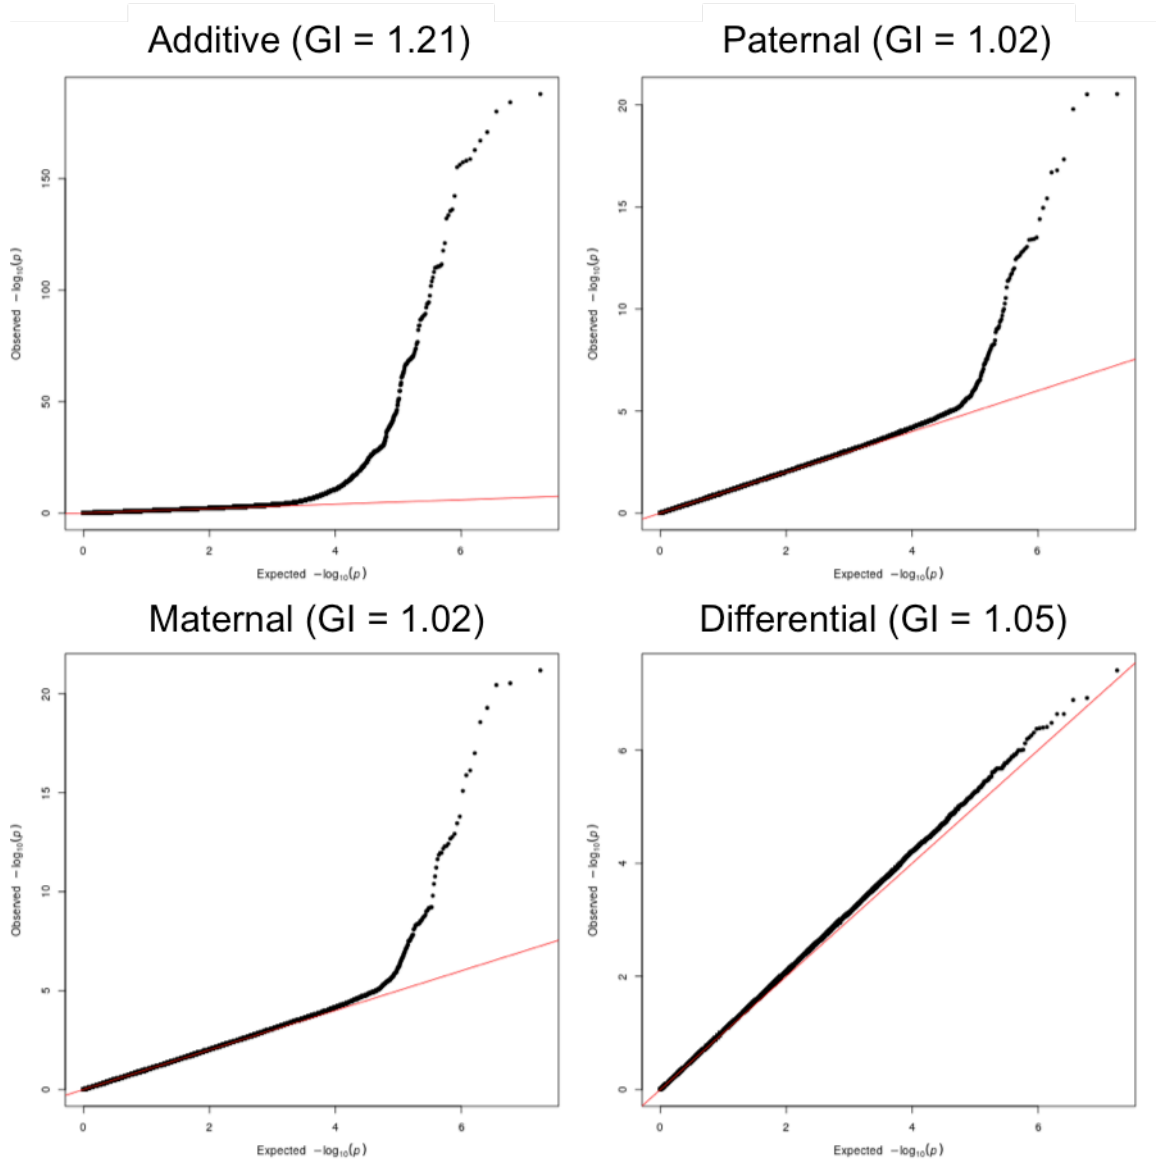

# Bilirubin

Additive (GI = 1.26)

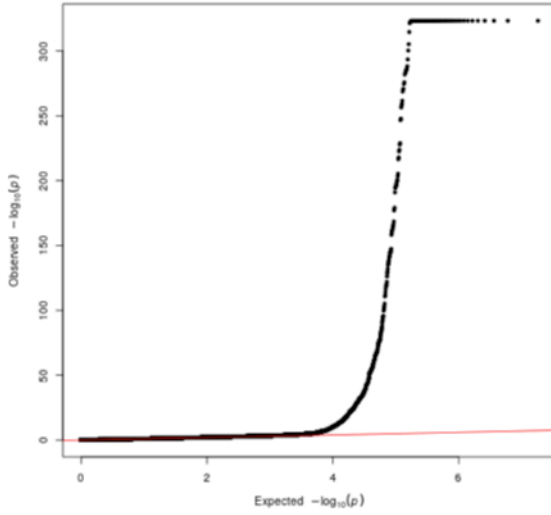

Paternal (GI = 1.36)

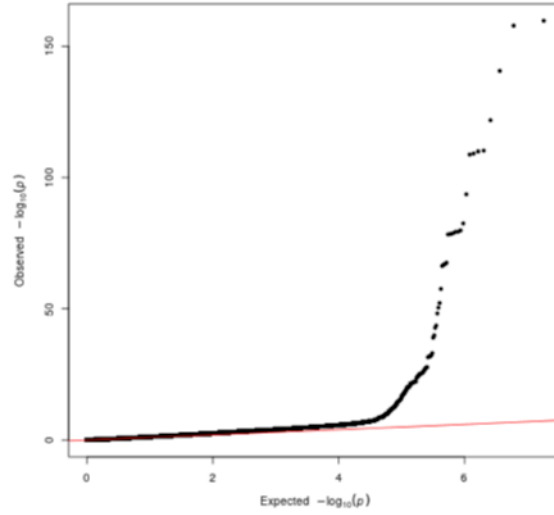

Maternal (GI = 1.37)

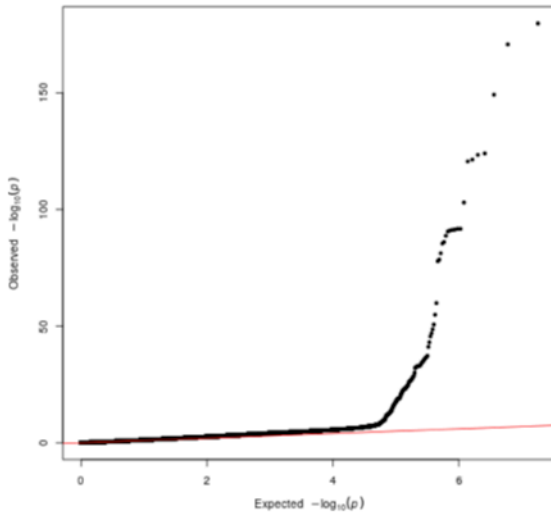

Differential (GI = 1.04)

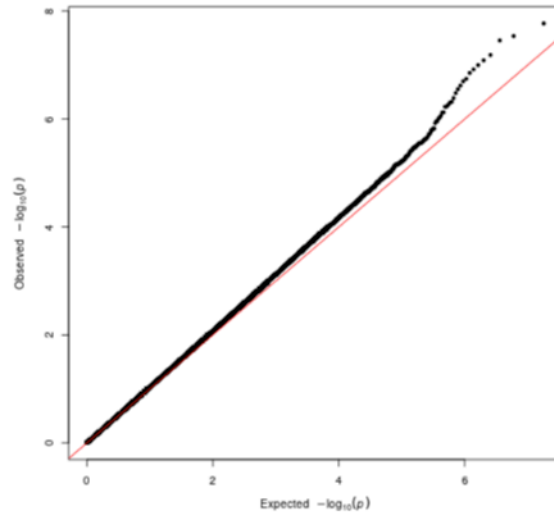

# Protein

Additive (GI = 1.16)

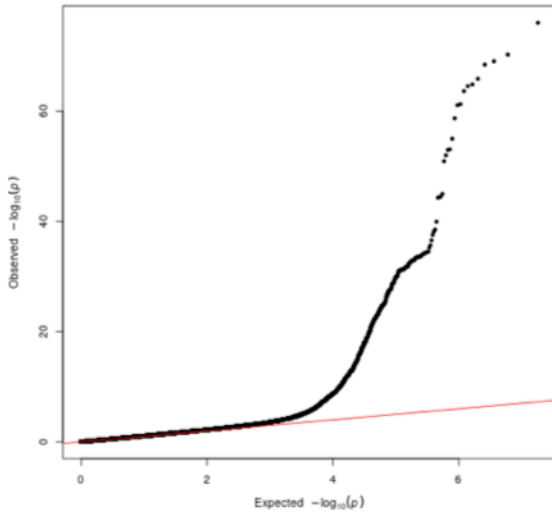

Paternal (GI = 1.01)

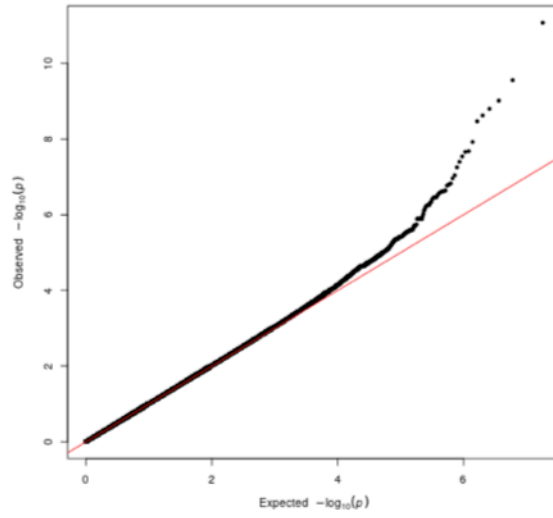

Maternal (GI = 1.01)

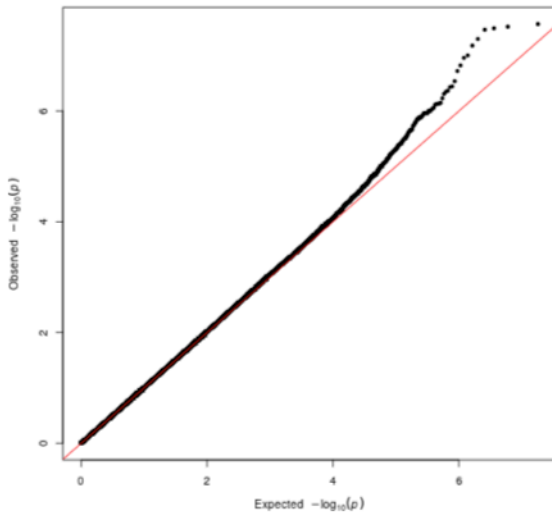

Differential (GI = 1.04)

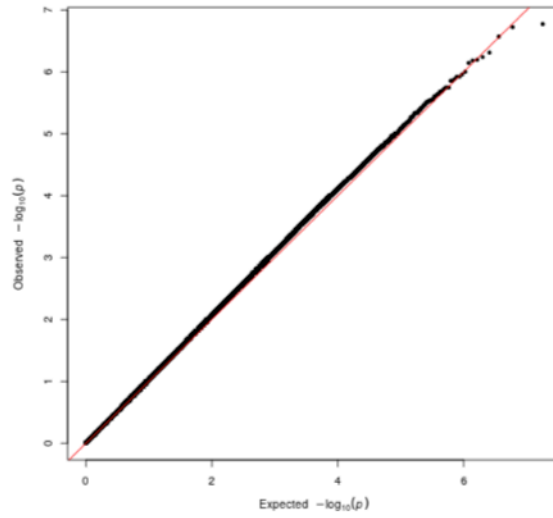



# Red blood cell counts

Additive (GI = 1.16)

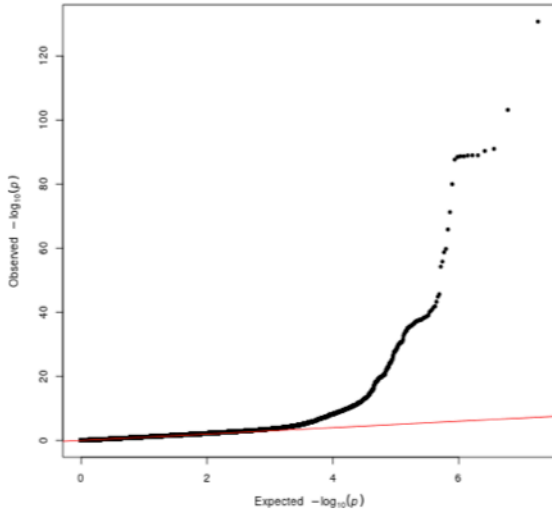

Paternal (GI = 1.39)

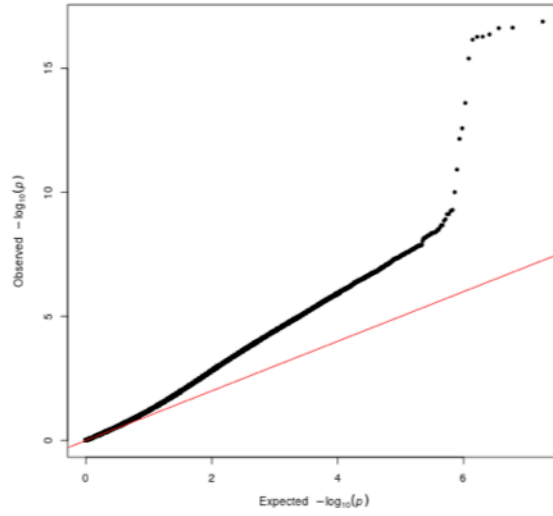

Maternal (GI = 1.40)

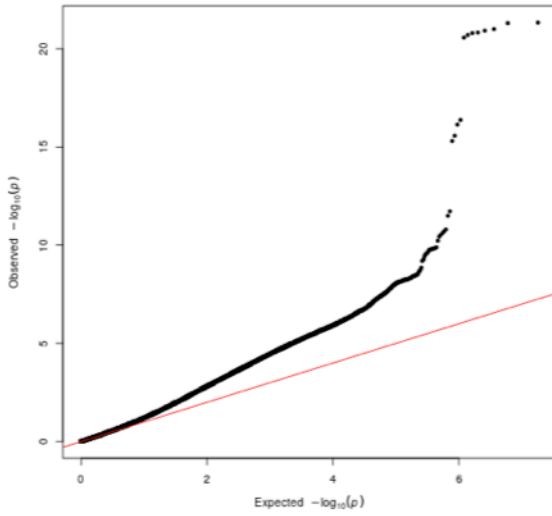

Differential (GI = 1.05)

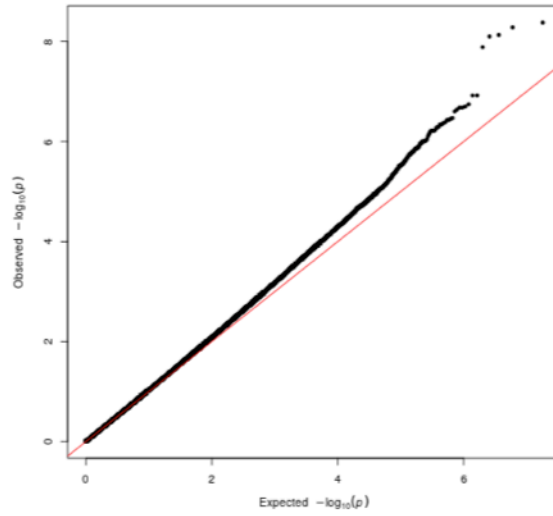

# HDL cholesterol

Additive (GI = 1.22)

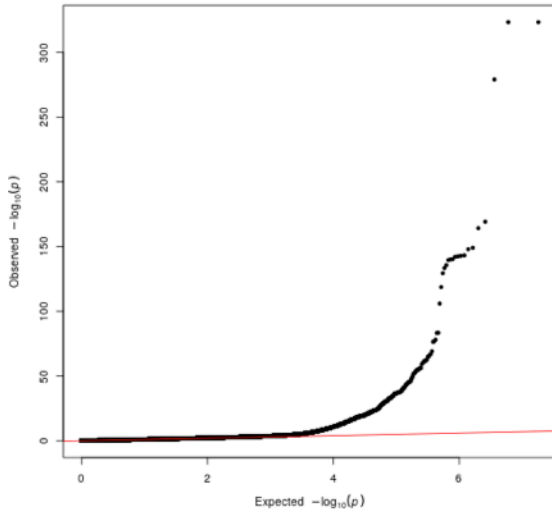

Paternal (GI = 1.35)

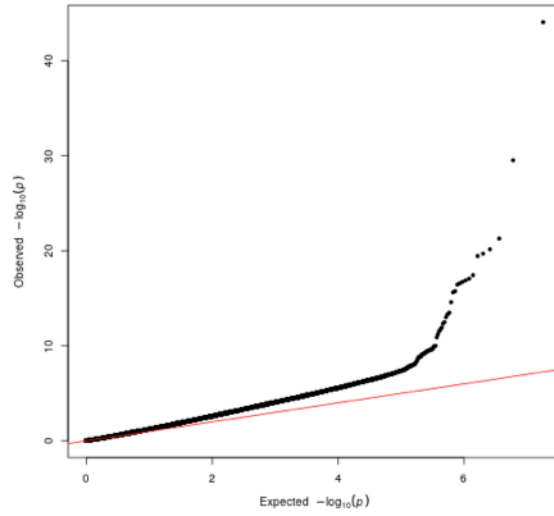

Maternal (GI = 1.36)

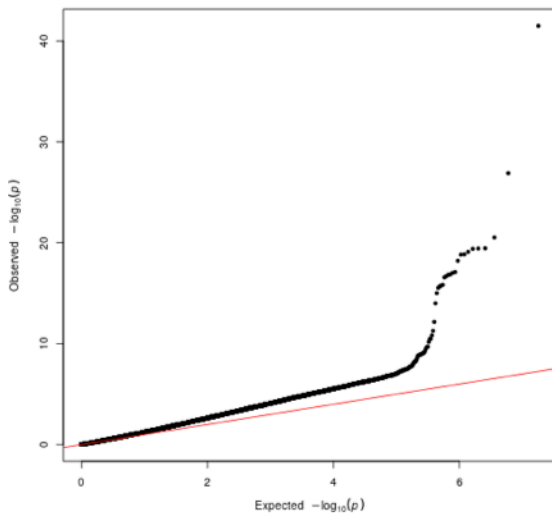

Differential (GI = 1.07)

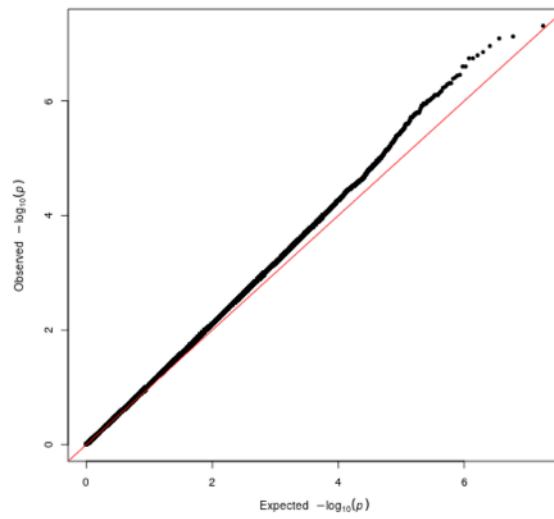

# Platelets

Additive (GI = 1.24)

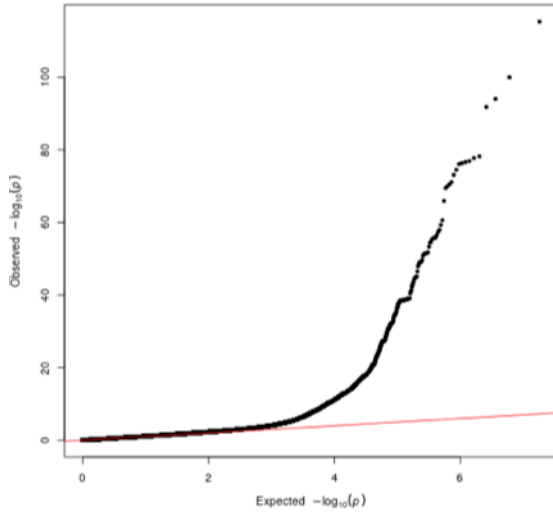

Paternal (GI = 1.06)

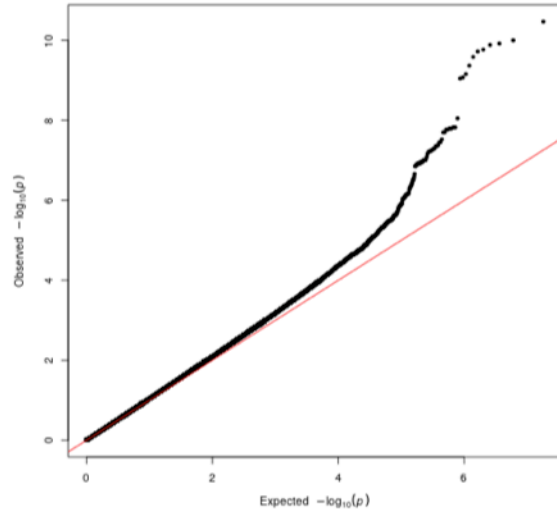

Maternal (GI = 1.05)

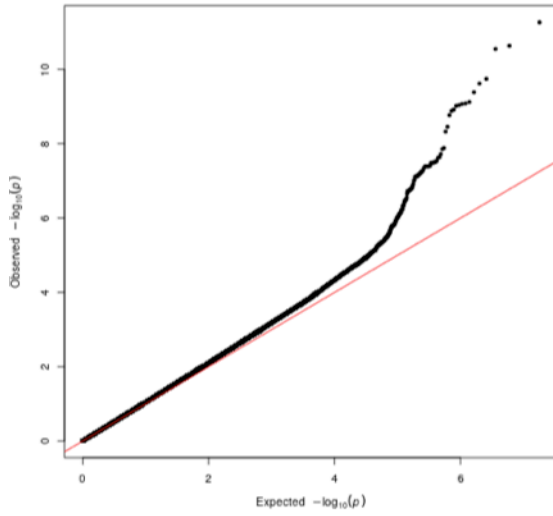

Differential (GI = 1.06)

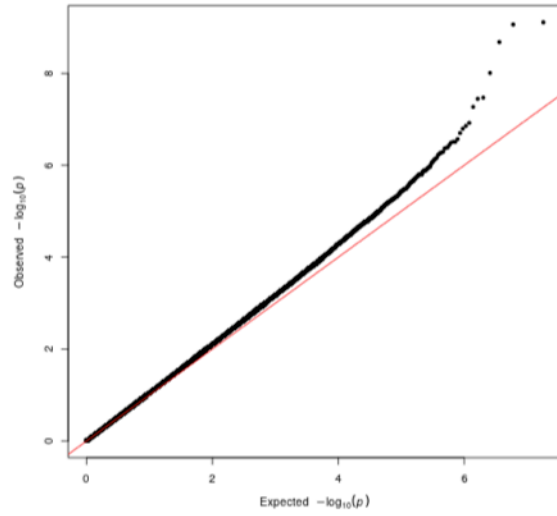

Supplement: mmc1.pdf [file mmc1.pdf]
